# Supplementary material
Source: PubMed Central journal article supplement (PMC3766764)
Supplement: NIHMS498242-supplement-supplement_1.pdf [file NIHMS498242-supplement-supplement_1.pdf]

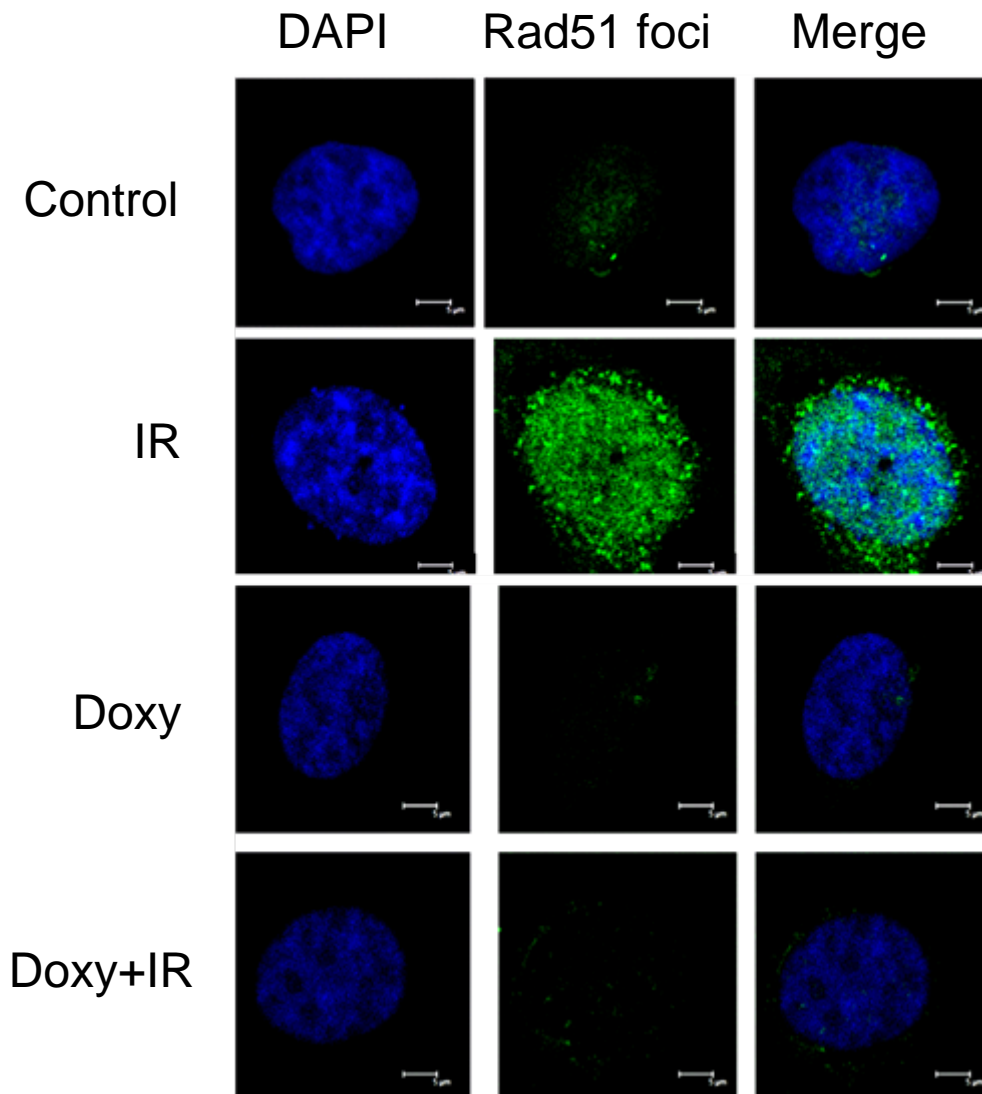

**Supplementary figure 1.** The detection of Rad51 foci formation in the nucleus of HCOXP cells under different conditions. IR:8Gy  $\gamma$ -rays. Doxy: 0.1 $\mu$ g/ml.

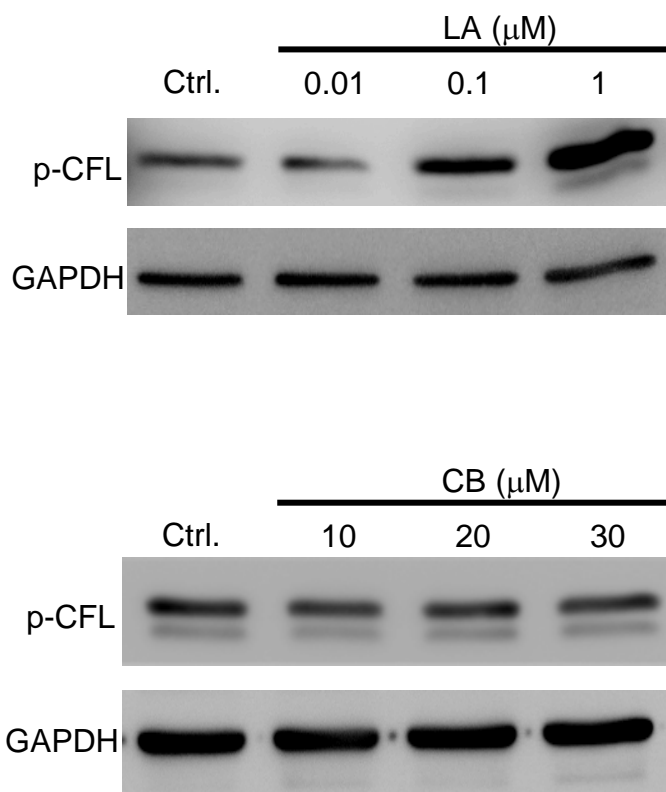

**Supplementary figure 2.** Dose-dependent induction of phosphorylated CFL-1 in H1299 cells by latrunculin A (LA) but not cytochalasin B (CB).

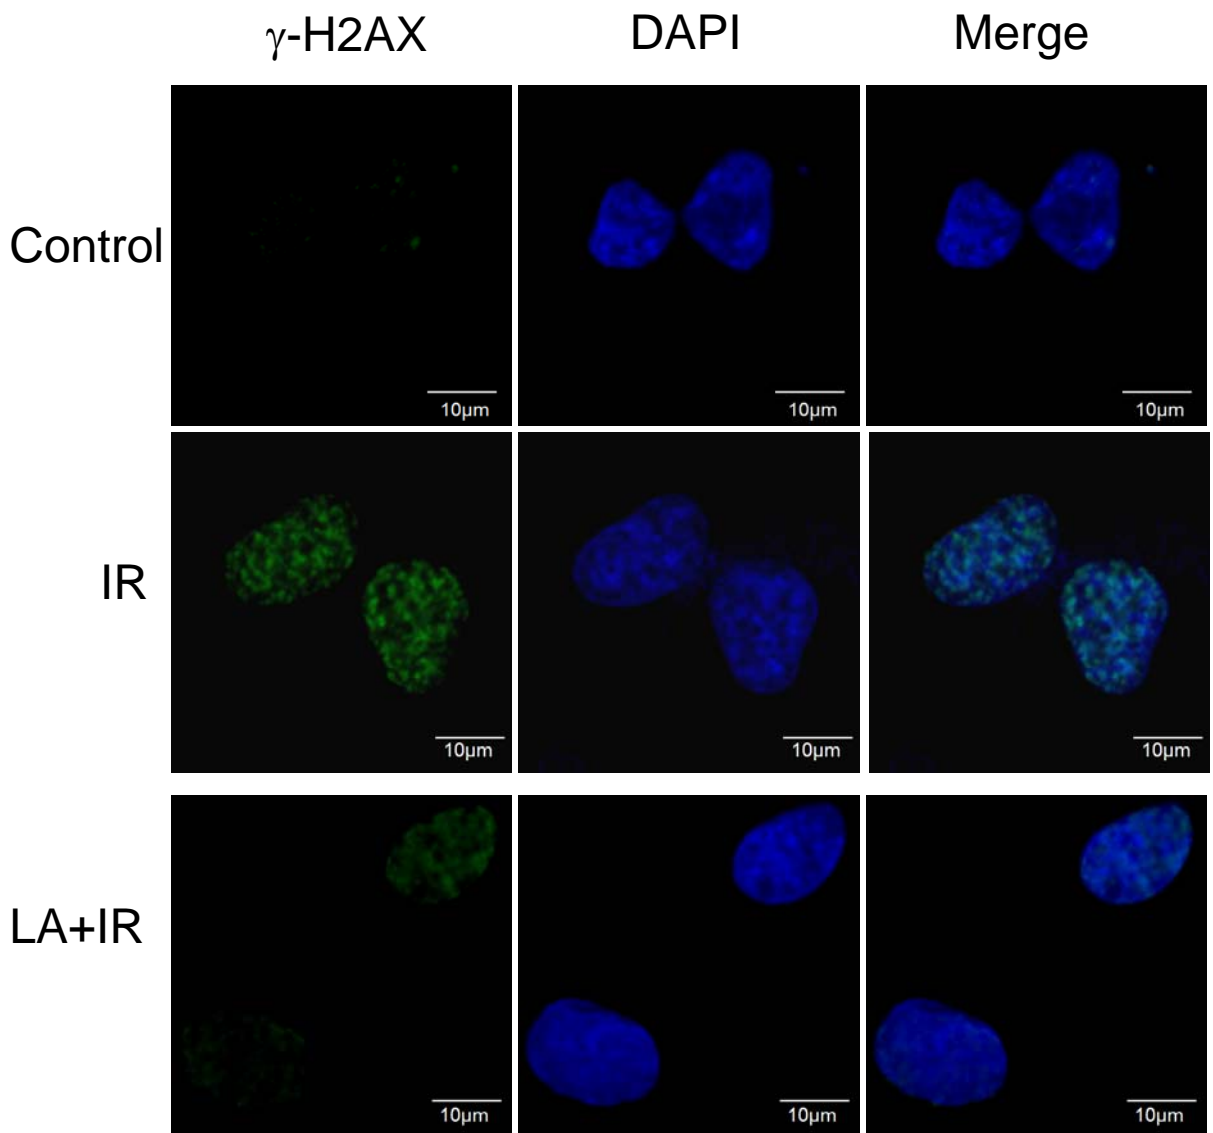

**Supplementary figure 3.**  $\gamma$ -H2AX foci formation was reduced in cells treated with Latrunculin A (1 $\mu$ M) after IR (8Gy).

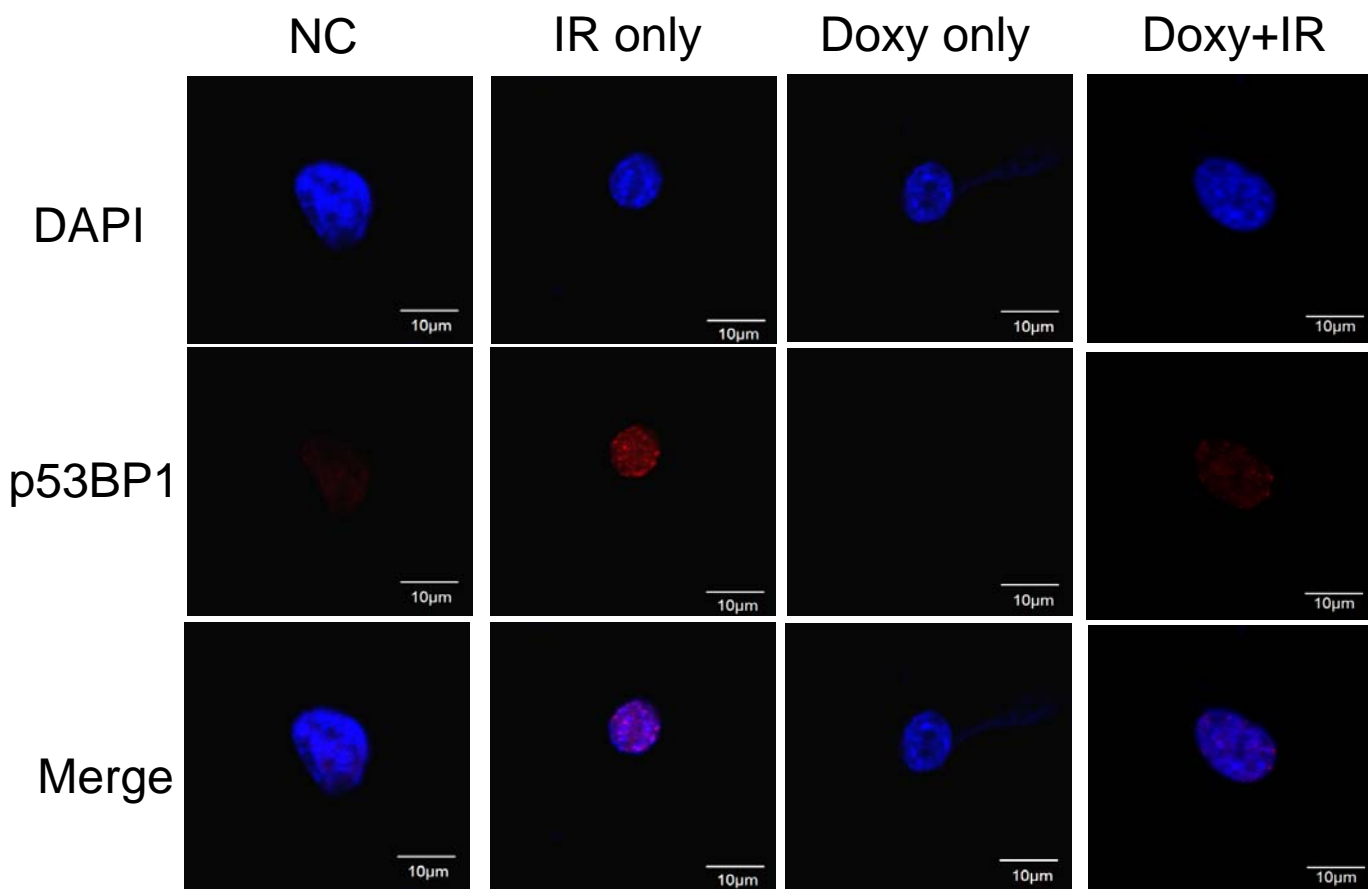

**Supplementary figure 4.** The detection of 53BP1 foci formation in the nucleus of HCOXP cells under different conditions. IR:8Gy  $\gamma$ -rays. Doxy: 0.1 $\mu$ g/ml.
